# Supplementary material for: The utility of medial temporal lobe atrophy (MTA) grading as a practical method for assessing tau pathology and neurodegeneration in early-stage Alzheimer’s disease
Source: Research Square preprint supplement (doi:10.21203/rs.3.rs-7091559/v1), 2025-07-23
Supplement: Supplementary file 1 [file a9055700130e34c9f1055784.docx]

**Tables**

Table 1 **Subjects**

**AzD group　 non-AzD group**

Number: 86 74

Age (Mean ± SD): 79 ± 8.0 77± 4.7

Sex (M: F): 44: 42 35: 39

MMSE (Mean ± SD): 23 ± 3.61 26± 4.24

ADAS-Cog (Mean ± SD): 11 ± 4.72 9 ± 5.71

RBMT (Mean ± SD): 6 ± 5.00 10 ± 6.21

CSF Aβ42 (Mean ± SD): 558.5 ± 176.02 901.5 ± 363.91

CSF T-tau (Mean ± SD): 654.5 ± 371.74 251 ± 129.60

CSF P-tau (Mean ± SD): 83.5 ± 37.15 4 2.05 ± 16.11

Right MTA (Median± SD): 1.75 ± 0.74 2 ± 0.86

Left MTA (Median± SD): 2 ± 0.77 2 ± 0.92

MMSE: Mini-Mental State Examination

ADAS-Cog: The Alzheimer's Disease Assessment Scale–Cognitive Subscale

RBMT: Rivermead Behavioural Memory Test

CSF: Cerebrospinal fluid

MTA: Medial temporal lobe atrophy

Table 2 **IOA for MTA grading and ICCs for Diffusion parameters**

Right Left

Inter-observer agreement (IOA)

MTA grading: 0.67 0.70

Intraclass correlation coefficients (ICCs) in hippocampal ROI values

NODDI_NDI: 0.71 0.77

NODDI_Viso: 0.11 0.07

NODDI_ODI: 0.71 0.75

DTI_FA: 0.75 0.80

DTI_MD: 0.49 0.87

DTI_AD: 0.85 0.90

DTI_RD: 0.79 0.83

MTA: Medial temporal lobe atrophy

NODDI: Neurite orientation dispersion and density imaging

NDI: Neurite density index

Viso: Isotropic volume fraction

ODI: Orientation dispersion index

DTI: Diffusion tensor imaging

FA: Fractional anisotropy

MD: Mean diffusivity

AD: Axial diffusivity

RD: Radial diffusivity

Table 3 **Hippocampal diffusion parameter values and the volume**

**AzD group**

Diffusion values (mm2/sec) Right Left

Observer A Observer B Observer A Observer B

NODDI_NDI (Mean ± SD): 0.37±0.03 0.37±0.03 0.37±0.03 0.36±0.03

NODDI_Viso (Mean ± SD): 0.10±0.03 0.27±0.07 0.10±0.03 0.26±0.07

NODDI_ODI (Mean ± SD): 0.53±0.04 0.51±0.04 0.55±0.04 0.53±0.04

DTI_FA (Mean ± SD): 0.13±0.02 0.14±0.02 0.12±0.02 0.13±0.02

DTI_MD (Mean ± SD): 0.72±0.03 0.73±0.03 0.72±0.03 0.74±0.04

DTI_AD (Mean ± SD): 0.81±0.03 0.83±0.04 0.81±0.03 0.83±0.04

DTI_RD (Mean ± SD): 0.67±0.03 0.68±0.03 0.68±0.03 0.69±0.04

Volume (mm3) (Mean ± SD): 　　 2948.82±478.40 3077.64±472.98

**non-AzD group**

Diffusion values (mm2/sec) Right Left

Observer A Observer B Observer A Observer B

NODDI_NDI (Mean ± SD): 0.37±0.03 0.38±0.03 0.37±0.03 0.36±0.03

NODDI_Viso (Mean ± SD): 0.10±0.04 0.25±0.11 0.10±0.04 0.25±0.08

NODDI_ODI (Mean ± SD): 0.54±0.04 0.52±0.04 0.55±0.05 0.53±0.06

DTI_FA (Mean ± SD): 0.13±0.02 0.14±0.02 0.12±0.02 0.13±0.02

DTI_MD (Mean ± SD): 0.71±0.06 0.72±0.04 0.72±0.05 0.74±0.05

DTI_AD (Mean ± SD): 0.80±0.07 0.82±0.07 0.81±0.07 0.83±0.07

DTI_RD (Mean ± SD): 0.67±0.06 0.67±0.05 0.68±0.05 0.69±0.05

Volume (mm3) (Mean ± SD): 　　　3148.52±581.79 3031.04±670.05

AzD: Alzheimer’s disease

NODDI: Neurite orientation dispersion and density imaging

NDI: Neurite density index

Viso: Isotropic volume fraction

ODI: Orientation dispersion index

DTI: Diffusion tensor imaging

FA: Fractional anisotropy

MD: Mean diffusivity

AD: Axial diffusivity

RD: Radial diffusivity

SD: Standard deviation
